# Supplementary material for: Optimal control-based nuclear spin cross-polarization in the presence of complicating anisotropic interactions
Source: Royal Society of Chemistry journal article supplement (doi:10.1039/d5cp00096c), 2025-01-01
Supplement: d5cp00096c1.pdf [file d5cp00096c1.pdf]

**Supplementary Information for**

**Optimal Control-Based Nuclear Spin Cross-Polarization in the Presence of  
Complicating Anisotropic Interactions**

**Shovik Ray<sup>1</sup>, Venkata S. Redrouthu<sup>2,3</sup>, Asif Equbal<sup>2,3</sup>, Sheetal Kumar Jain<sup>1,\*</sup>**

<sup>1</sup>Solid State and Structural Chemistry Unit, Indian Institute of Science, Bangalore, India

<sup>2</sup>Department of Chemistry, New York University, Abu Dhabi 129188, United Arab Emirates

<sup>3</sup>Center for Quantum and Topological Systems, New York University, Abu Dhabi 129188, United Arab Emirates

\* Correspondence to Email: [skj@iisc.ac.in](mailto:skj@iisc.ac.in)

### Table: Table of Contents

| Index | Content                                                                                                                                                                  | Page No. |
|-------|--------------------------------------------------------------------------------------------------------------------------------------------------------------------------|----------|
| 1     | Figure-S1: Pictorial depiction of the spin-system and optimizing conditions                                                                                              | 3        |
| 2     | Figure-S2: Optimized RF shapes of OPTIANS                                                                                                                                | 4        |
| 3     | Figure-S3: Ramp optimization at 9.4 T.                                                                                                                                   | 5        |
| 4     | Figure-S4: PT efficiency of OPTIANS in $^{19}\text{F}$ - $^{27}\text{Al}$ , $^{19}\text{F}$ - $^{23}\text{Na}$ and $^{19}\text{F}$ - $^{13}\text{C}$ systems             | 6        |
| 5     | Figure-S5: PT efficiencies as a function of negative CSA and QC values, and variation of asymmetry parameter.                                                            | 7        |
| 6     | Figure-S6: 1D offset profiles of $^{19}\text{F}$ and $^7\text{Li}$ channel.                                                                                              | 8        |
| 7     | Figure-S7: Fitted experimental spectra of $^{19}\text{F}$ and $^{27}\text{Al}$ .                                                                                         | 9        |
| 8     | Figure-S8: PT efficiency comparison of OPTIANS and different Ramp profiles for experimental condition, in case of $^{19}\text{F}$ - $^7\text{Li}$ system.                | 10       |
| 9     | Figure-S9: Effect of distribution of Homo ( $^{19}\text{F}$ - $^{19}\text{F}$ )- and Hetero ( $^{19}\text{F}$ - $^7\text{Li}$ ) - nuclear dipolar coupling on PT curves. | 11       |
| 10    | Figure-S10: Experimental PT and 1D-MAS NMR signal of OPTIANS and RACP in $^{19}\text{F}$ - $^{23}\text{Na}$ and $^{19}\text{F}$ - $^{27}\text{Al}$ spin systems.         | 12       |
| 11    | Figure-S11: Comparison of experimental power optimization in $^{19}\text{F}$ channel and Experimental Offset profiles for RACP and OPTIANS.                              | 13       |
| 12    | Figure-S12: Reduction of number of points from OPTIANS' optimized shapes.                                                                                                | 14       |
| 13    | SIMPSON Script for Buildup (OPTIANS and SACP)                                                                                                                            | 15-16    |
| 14    | SIMPSON Script for Buildup (RACP)                                                                                                                                        | 17-18    |
| 15    | SIMPSON Script for Optimal Control Optimization                                                                                                                          | 19-20    |
| 16    | Bruker Pulse Program for OPTIANS 1D experiment                                                                                                                           | 21-22    |
| 17    | Bruker Pulse Program for OPTIANS 2D experiment                                                                                                                           | 23-24    |
| 18    | Table S1: Experimental parameters of $^{19}\text{F}$ - $^7\text{Li}$ experiments.                                                                                        | 25       |
| 19    | Table S2: Experimental parameters of $^{19}\text{F}$ - $^{23}\text{Na}$ experiments.                                                                                     | 25       |
| 20    | Table S3: Experimental parameters of $^{19}\text{F}$ - $^{27}\text{Al}$ experiments.                                                                                     | 26       |

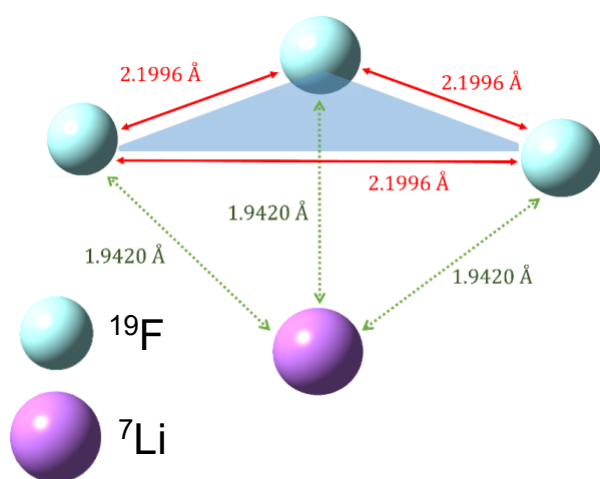

## Simulation Parameters

- $^{19}\text{F} - ^{19}\text{F}$  Dipolar Coupling: 10 kHz
- $^{19}\text{F} - ^7\text{Li}$  Dipolar Coupling: 6 kHz
- $^{19}\text{F}$  Chemical Shift Anisotropy: 210 ppm
- $^7\text{Li}$  Quadrupolar Coupling: 250 kHz.
- Magic Angle Spinning Frequency: 42 kHz.
- $^1\text{H}$  Larmor Frequency: 400 MHz
- Pulse Digitization:  $0.3 \mu\text{s}$

**Figure S1.** Schematic representation of the spin system and the interaction strengths used in the simulations. Right Side data shows amount of anisotropic interactions (dipolar coupling, CSA and QC), and optimizing conditions of MAS and spectrometer field.

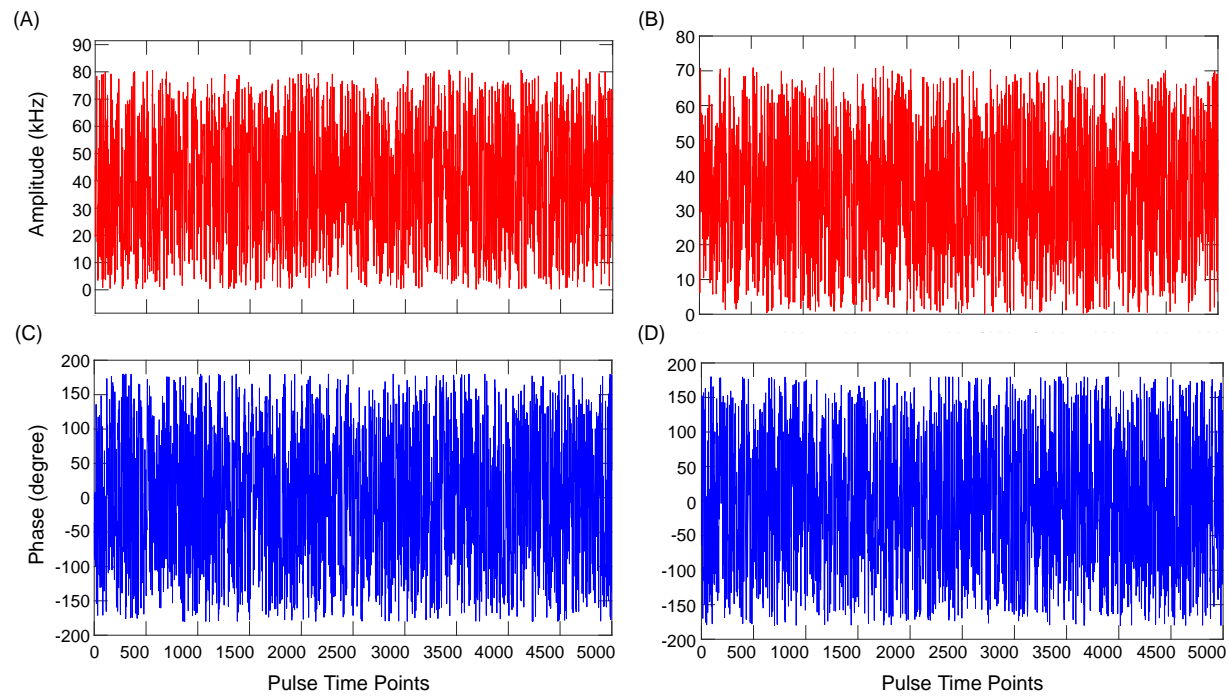

**Figure S2.** Optimized RF Shapes. Amplitude and phase profiles of OTPIANS for  $^{19}\text{F}$  channel (A and C) and  $^7\text{Li}$  channel (B and D), respectively. The digitization is 300 ns. The parameters used in the simulations to generate the shapes are provided in the methods section.

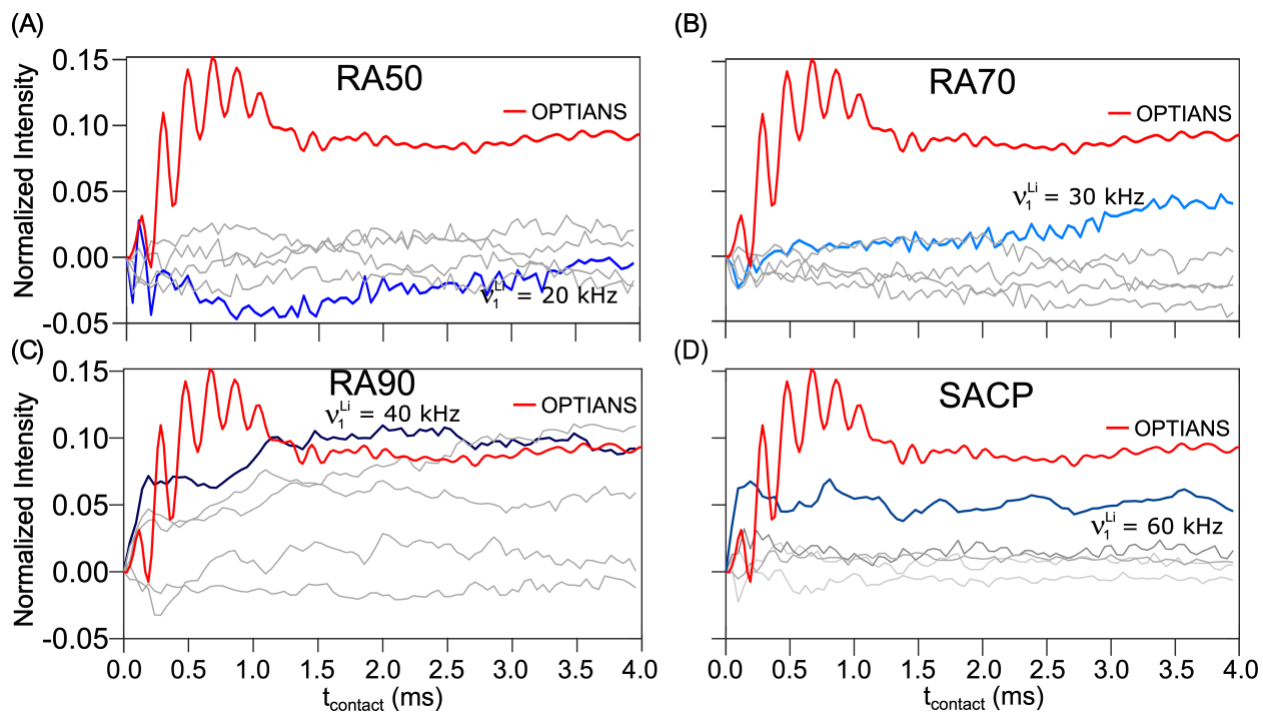

**Figure S3.** Comparison of (A) Ramp50-100 (RA50), (B) Ramp70-100 (RA70), (C) Ramp90-100 (RA90), and (D) Single Amplitude CP (SACP) with OPTIANS simulated at 9.4T field with fixed  $\mathbf{v}_r = 42$  kHz,  $\delta_{CSA}^F = 210$  ppm,  $C_Q^{LI} = 250$  kHz, and for RACP  $\mathbf{v}_1^f = 100$  kHz, and varied  $\mathbf{v}_1^{LI}$  in the range of 20 to 60 kHz. The colors curves are the ones used in Figure 1A while the gray curves indicate remaining simulations with varying  $\mathbf{v}_1^{LI}$  values.

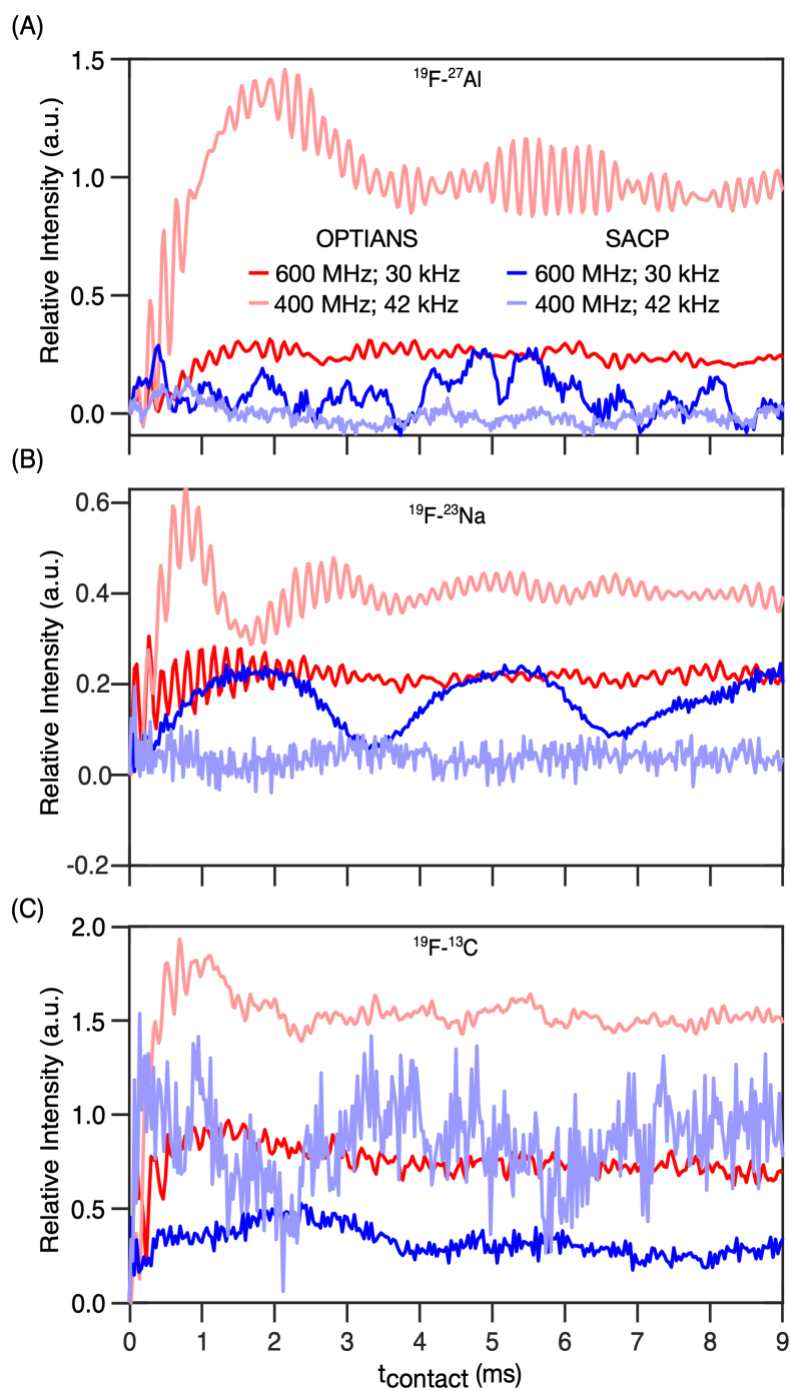

**Figure S4.** The simulated polarization transfer curves for SACP (Blue) and OPTIANS (Red) to compare the polarization transfer efficiency for various spins systems (A)  $^{19}\text{F}-^{27}\text{Al}$ , (B)  $^{19}\text{F}-^{23}\text{Na}$ , and (C)  $^{19}\text{F}-^{13}\text{C}$  as labeled on the plots. The dark colors represent 600 MHz spectrometer and 30 kHz MAS, and the faded colors are for 400 MHz spectrometer and 42 kHz MAS. The intensities on y-axis are taken from the direct output of SIMPSON simulations without any further normalization.

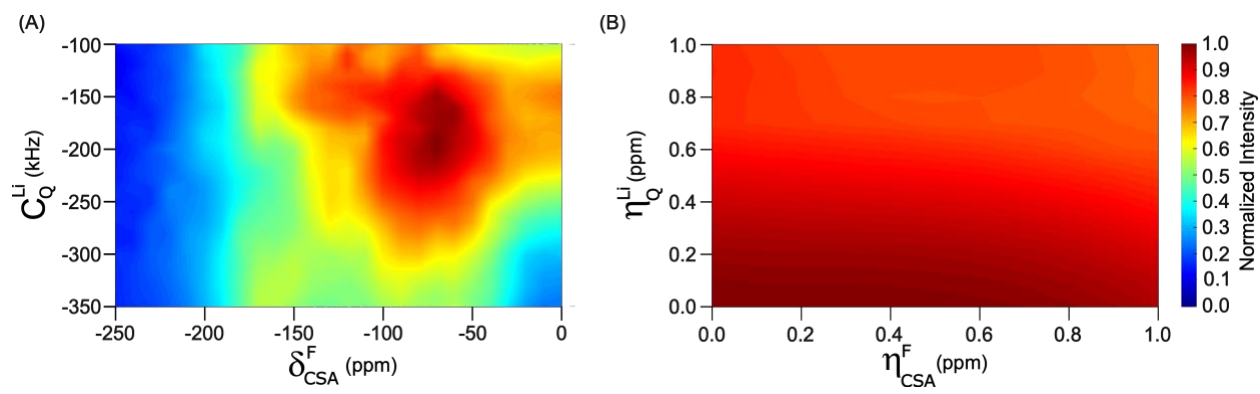

**Figure S5.** Simulated profiles of (A) Polarization transfer efficiency of OPTIANS as a function of negative values of CSA, and QC to demonstrate the biaxiality of OPTIANS; (B)  $\eta_{CSA}^F$  and  $\eta_Q^{Li}$  variation for visualizing the powder dependency of OPTIANS.

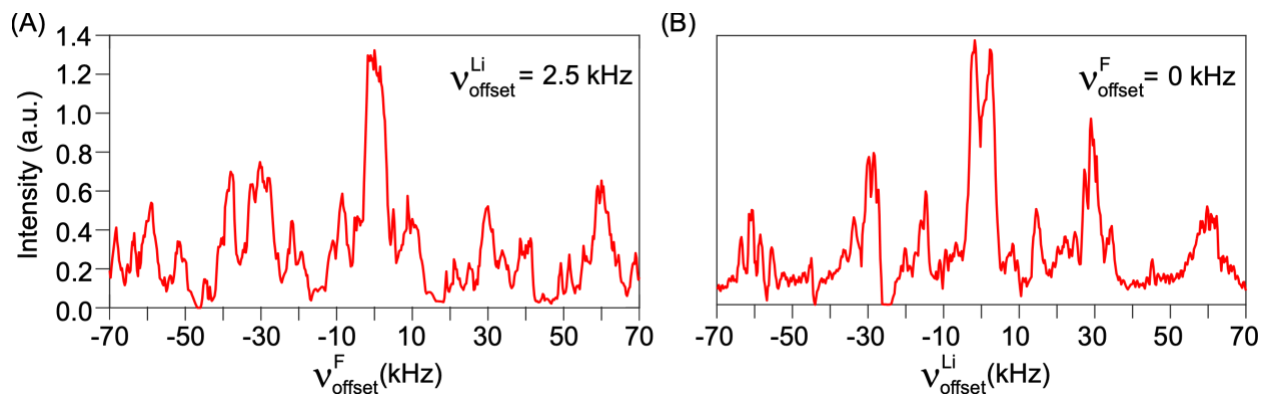

**Figure S6.** Simulated 1D offset profiles of OPTIANS on  $^{19}\text{F}$  and  $^7\text{Li}$  channels. (A) Offset profile for  $^{19}\text{F}$  channel with keeping  $^7\text{Li}$  offset fixed to 2.5 kHz, the most intense peak coming in Figure 3(B) along  $^7\text{Li}$  channel; (B) Offset profile for  $^7\text{Li}$  channel with keeping  $^{19}\text{F}$  offset fixed to 0 kHz, the most intense peak coming in Figure 3(B), along  $^{19}\text{F}$  channel. Rest parameters are same as Figure 3B OPTIANS simulation.



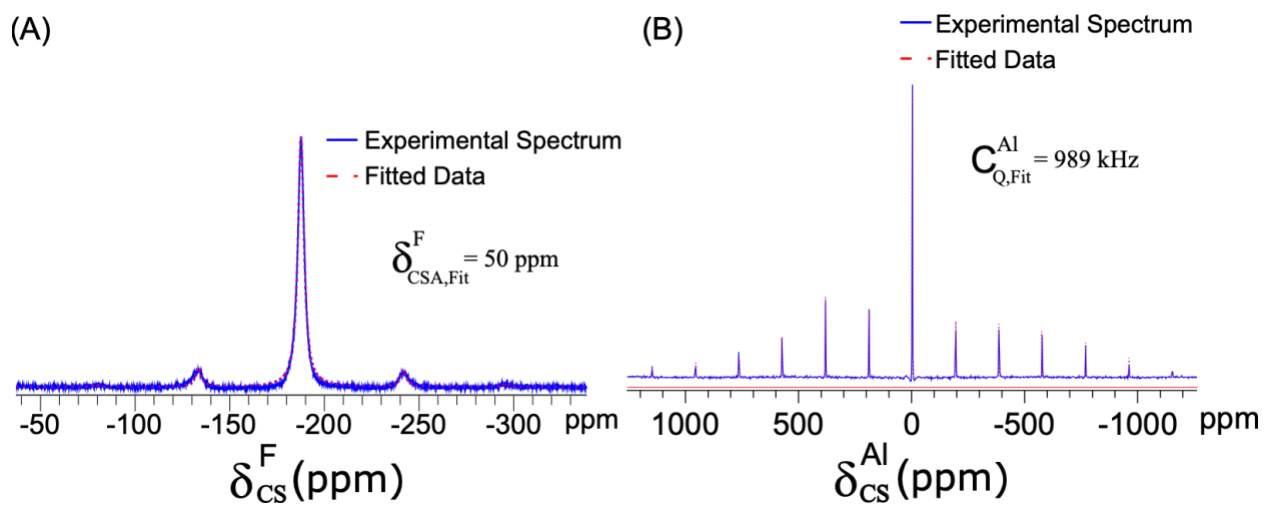

**Figure S7.** Experimental data and simulated fits of (A)  $^{19}\text{F}$  Hahn-echo; (B)  $^{27}\text{Al}$  spectra. The fitted values are  $\delta_{\text{CSA}}^{\text{F}} = 50$  ppm, and  $C_{\text{Q}}^{\text{Al}} = 989$  kHz, respectively.

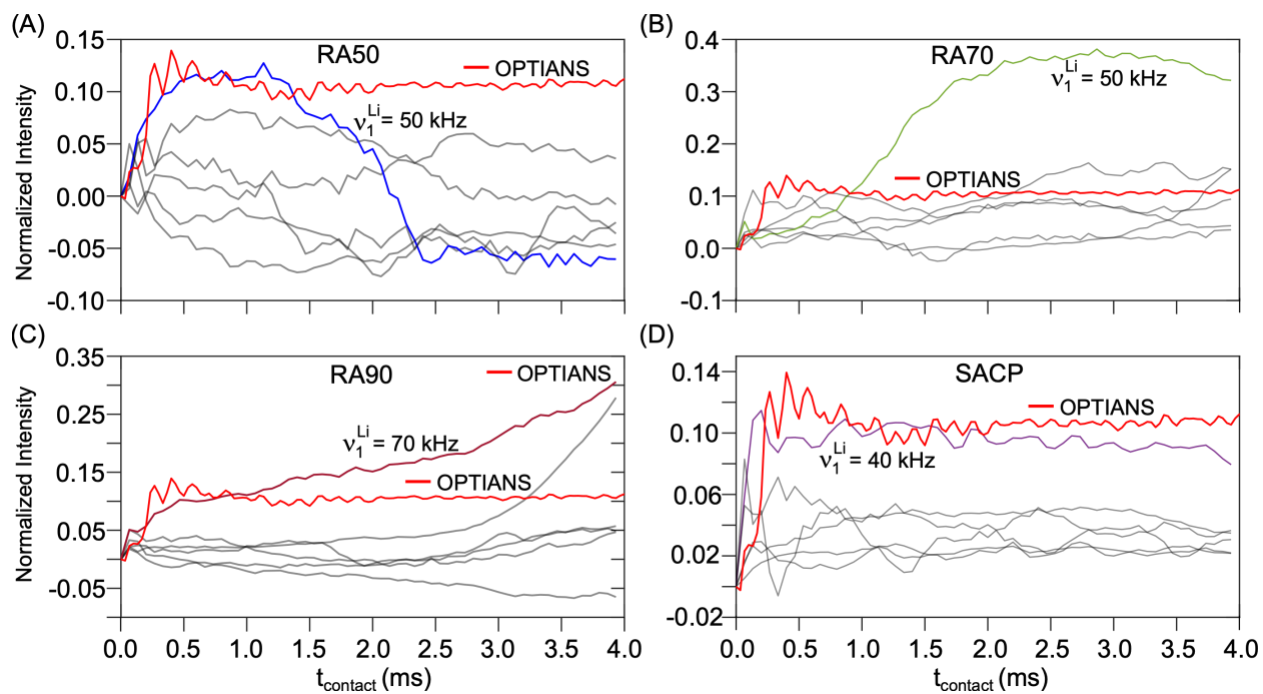

**Figure S8.** Various RACP and OPTIANS simulations at 14.1 T field with  $\nu_r = 30$  kHz,  $\delta_{CSA}^F = 50$  ppm,  $C_Q^{Li} = 250$  kHz, and for RACP  $\nu_1^F = 100$  kHz and varied  $\nu_1^{Li}$  in the range of 20 to 60 kHz. The colored curves are the ones used in Figure 1A while the gray curves indicate remaining simulations with varying  $\nu_1^{Li}$  values.

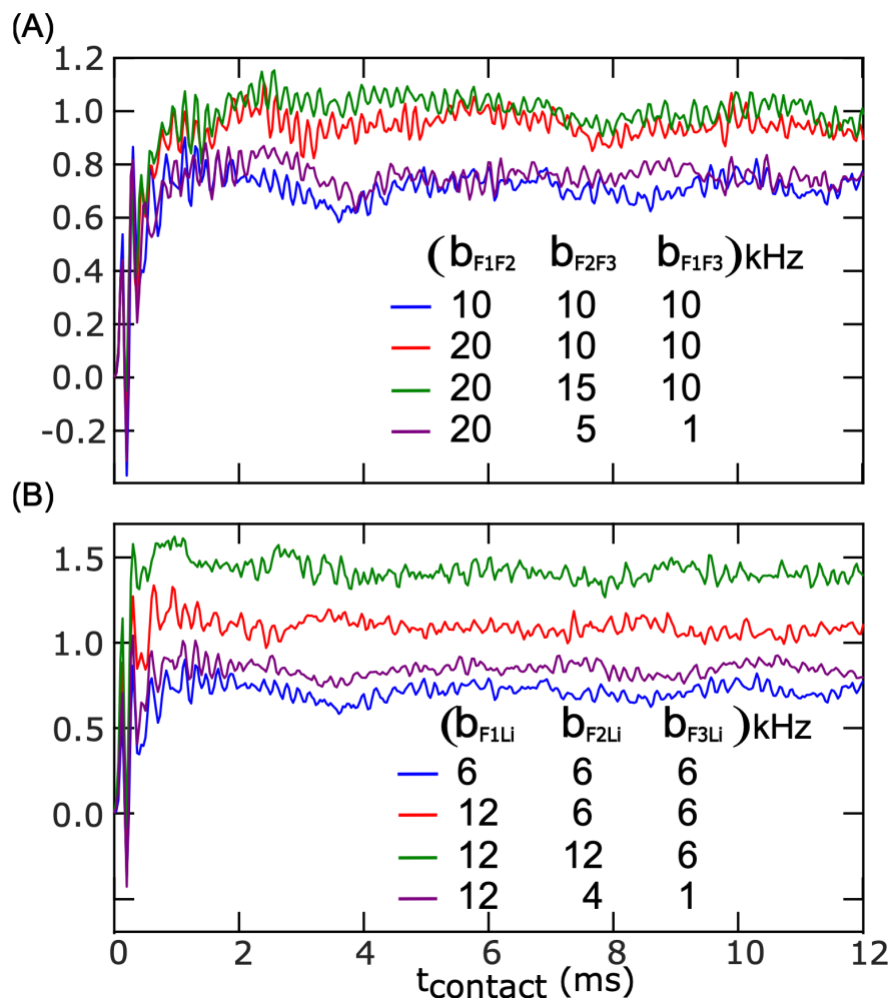

**Figure S9.**  $^{19}\text{F}$ - $^7\text{Li}$  polarization transfer curves using OPTIANS simulated at 14.1 T with 30 kHz MAS. The plot (A) was obtained varying three  $b_{F-F}$  and plot (B) was obtained by varying the three  $b_{F-Li}$ . The efficiencies and the oscillations are affected by the strength of the dipolar couplings as well as the distribution of dipolar coupling present in the spin system. All the polarization transfer curves are produced with relative intensity in arbitrary unit.

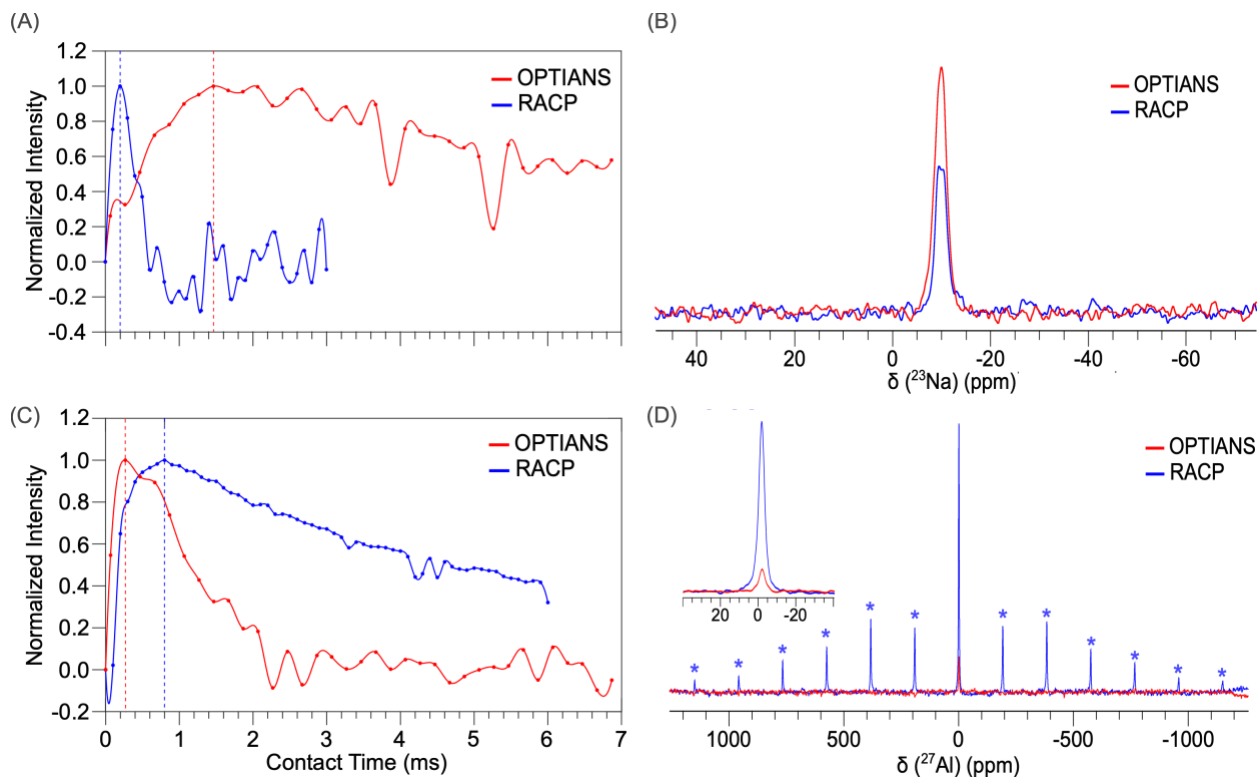

**Figure S10.** Experimental Polarization Transfer Curves and 1D Spectra of  $^{23}\text{Na}$  and  $^{27}\text{Al}$  Using OPTIANS and RACP. (A)  $^{19}\text{F}$ - $^{23}\text{Na}$  PT curves recorded using RACP (blue) and OPTIANS (red). Red and blue dotted lines represent the optimal contact times for OPTIANS (1.4 ms) and RACP (200  $\mu\text{s}$ ), respectively. (B) Comparison of  $^{23}\text{Na}$  MAS NMR signal recorded using RACP (blue) and OPTIANS (red) with optimal contact time (dotted lines). (C)  $^{19}\text{F}$ - $^{27}\text{Al}$  polarization transfer curves recorded using RACP (blue) and OPTIANS (red). Red and blue dotted lines represent the optimal contact times for OPTIANS (233  $\mu\text{s}$ ) and CPMAS (800  $\mu\text{s}$ ), respectively. (D) Comparison of  $^{27}\text{Al}$  MAS NMR signal recorded using CPMAS (blue) and OPTIANS (red) with optimal contact time (dotted lines). The time steps for recording polarization transfer curves were 100  $\mu\text{s}$  in RACP and 200.1  $\mu\text{s}$  in case of OPTIANS.

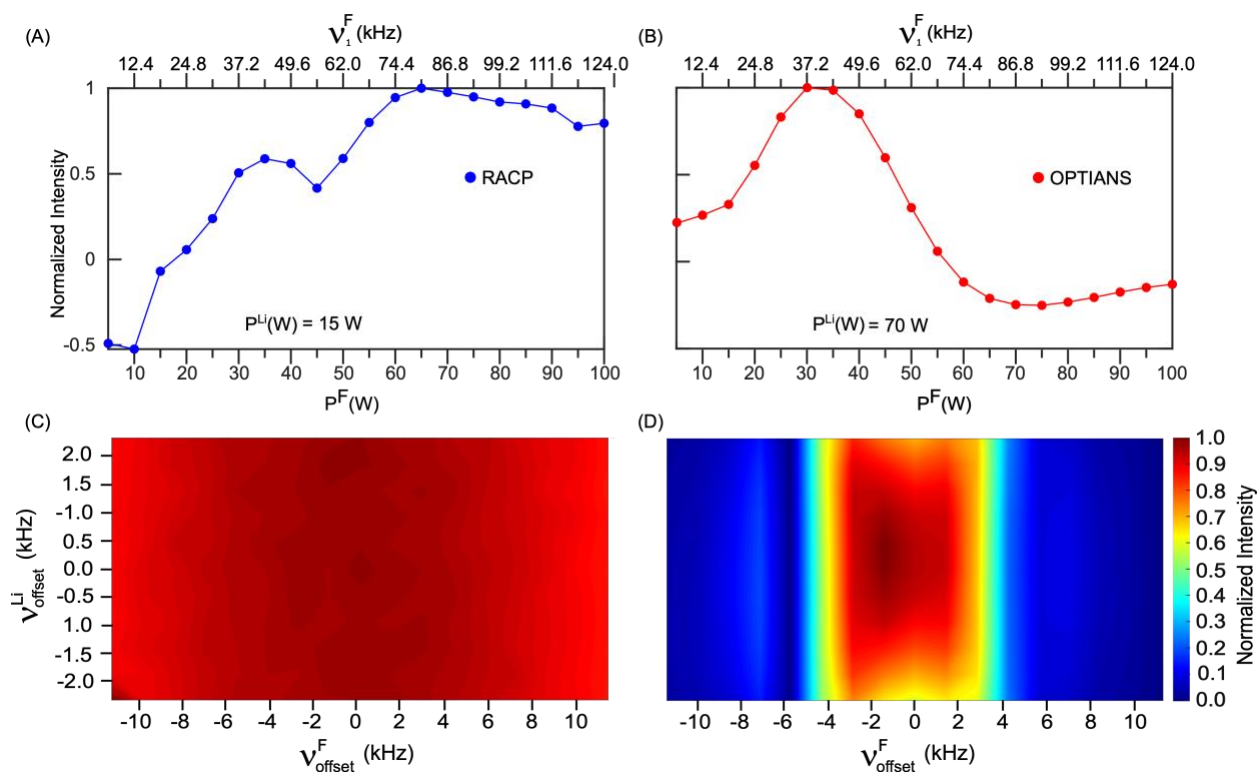

**Figure S11.** Experimental optimization of the contact pulse and power levels on  $^{19}F$  channel for (A) RACP (blue) and (B) OPTIANS (red). During this optimization,  $^7Li$  power level was set to 15 W (30.9 kHz) and 70 W (66.8 kHz) for CPMAS and OPTIANS, respectively. Experimental Offset Profiles of (C) SACP and (D) OPTIANS recorded by variation of offset in both  $^{19}F$  and  $^7Li$  channels in an array.

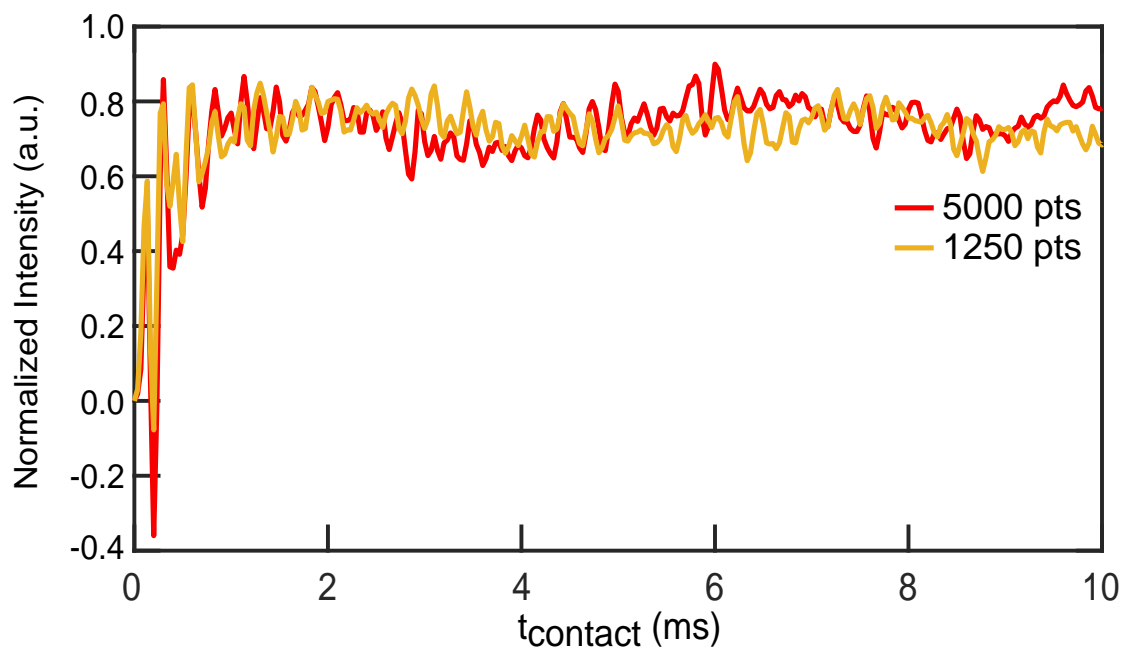

**Figure S12.** The simulated polarization transfer curves for optimized OPTIANS with 5000 pulse points (Red) and for a pulse which with every fourth point of the original one that is 1250 points (Yellow). The simulation was done at 600 MHz spectrometer with 30 kHz MAS frequency.

## SIMPSON Script for Buildup (OPTIANS and SACP)

```
spinsys {
  channels      19F 7Li
  nuclei        19F 19F 19F 7Li
  shift         1 0p 210p 0.1 0 0 0
  shift         2 0p 210p 0.1 0 0 0
  shift         3 0p 210p 0.1 0 0 0
  shift         4 0p 10p 0.5 0 0 0
  dipole        1 2 -10000 0 0 0
  dipole        1 3 -10000 0 0 0
  dipole        2 3 -10000 0 0 0
  dipole        1 4 -6000 0 0 0
  dipole        2 4 -6000 0 0 0
  dipole        3 4 -6000 0 0 0
  quadrupole    4 1 0.25e6 0.107 0 0 0
}

par {
  proton_frequency 400e6
  spin_rate         42000
  start_operator    l1x+l2x+l3x
  detect_operator   l4p
  crystal_file      rep20
  sw                spin_rate
  variable duration 3000
  variable tsw      1.0e6/sw
  variable tau      1.0e6/spin_rate
  # np              round(duration/tsw)
  np                400
  Gamma_angles     16
  verbose           1101
  method           direct
  num_cores        64
  dipole_check     false
}

proc pulseseq {} {
  global par shF shLi
  acq_block {
    #pulse $par(tsw) 86000 0 44000 0    #for SACP
    pulse_shaped $par(tsw) $shF $shLi  #for OPTIANS
  }
}

#Take the OPTIANS shapes from the data deposited in FigShare.

proc main {} {
  global par shF shLi

  #Load shape for 19F channel
  set shF [load_shape ./F3Li_F_reopt_dur105ms_MAS42_LiQC250k_FCSA210p_XP_rep20.dat]

  #Load shape for 7Li channel
  set shLi [load_shape ./F3Li_Li_reopt_dur105ms_MAS42_LiQC250k_FCSA210p_XP_rep20.dat]

  set f [fsimpson]
```

```
fsave $f ./buildup_file_name.txt
fzerofill $f 16000
faddlb $f 100 0
fft $f
fsave $f ./Fourier_Transformed_buildup_file_name.txt
}
```



## SIMPSON Script for Buildup using RACP (ramped-CP)

```
spinsys {  
  
  channels    19F 7Li  
  nuclei     19F 19F 19F 7Li  
  shift      1 0p 210p 0 0 0 0  
  shift      2 0p 210p 0 0 0 0  
  shift      3 0p 210p 0 0 0 0  
  shift      4 0p 10p 0 0 0 0  
  dipole     1 2 -10000 0 0 0  
  dipole     1 3 -10000 0 0 0  
  dipole     2 3 -10000 0 0 0  
  dipole     1 4 -6000 0 0 0  
  dipole     2 4 -6000 0 0 0  
  dipole     3 4 -6000 0 0 0  
  quadrupole 4 1 0.25e6 0.107 0 0 0  
}  
  
par {  
  proton_frequency 400e6  
  spin_rate        42000  
  start_operator   l1x+l2x+l3x  
  detect_operator  l4x  
  
  crystal_file     rep100  
  gamma_angles    8  
  
  sw               spin_rate/2  
  variable tsw     1.0e6/sw  
  variable aq_time 0.004  
  np               int(sw*aq_time)  
  num_cores       32  
  verbose         0  
  method          direct  
  dipole_check    false  
}  
  
proc pulseq {} {  
  global par  
  
  acq  
  for {set j 1} {$j<$par(np)} {incr j} {  
  
    #Preparation of Ramp  
    set rf_ch1 [expr $par(rf_ch1_Min)+($j-1)*($par(rf_ch1_Max)-$par(rf_ch1_Min))/$par(np)-1]  
    #set rf_ch2 [expr $par(rf_ch2_Min)+($j-1)*($par(rf_ch2_Max)-$par(rf_ch2_Min))/$par(np)-1]  
  
    pulse $par(tsw) $rf_ch1 0.0 $par(rf_ch2) 0.0  
    acq  
  
  }  
}
```

```

proc main {} {
    global par

    for {set k 1} {$k<6} {incr k} {
        for {set i 1} {$i<7} {incr i} {

            set par(rf_ch1_Max) 100000.0

            set par(rf_ch2) [expr 10000.0+$k*10000.0]
            set par(ramp_mid) [expr 70+5*$i]
            set par(ramp_start) [expr 2*$par(ramp_mid)-100]
            set par(rf_ch1_Min) [expr $par(rf_ch1_Max)*(2*$par(ramp_mid)-100)/100]

            set name ./ RACP_600_conT_3ms_rfF_100kHz_ramp_$par(ramp_start)\_rfLi_$par(rf_ch2)

            set f [fsimpson]
            puts "$name"

            fsave $f $name.txt
        }
    }
}

```

## SIMPSON Script for Optimal Control Optimization

```
spinsys {  
  channels      19F 7Li  
  nuclei        19F 19F 19F 7Li  
  shift         1 0p 210p 0.5 0 0 0  
  shift         2 0p 210p 0.5 0 0 0  
  shift         3 0p 210p 0.5 0 0 0  
  shift         4 10p 20p 0.5 0 0 0  
  dipole        1 2 -10000 0 0 0  
  dipole        1 3 -10000 0 0 0  
  dipole        2 3 -10000 0 0 0  
  dipole        1 4 -6000 0 0 0  
  dipole        2 4 -6000 0 0 0  
  dipole        3 4 -6000 0 0 0  
  quadrupole    4 1 0.25e6 0.5 0 0 0  
}
```

```
par {  
  proton_frequency 400e6  
  spin_rate         42000  
  gamma_angles     16  
  crystal_file      rep168  
  start_operator    l1x+l2x+l3x  
  detect_operator   l4p  
  variable NOC      2000  
  variable duration 1500  
  oc_tol_cg         1e-8  
  oc_tol_ls         1e-7  
  oc_mnbrak_step    5000  
  oc_cutoff_iter    5000  
  oc_max_brack_eval 5000  
  oc_max_brent_eval 5000  
  num_cores         8  
  oc_verbose        1  
}
```

```
proc pulseseq {} {  
  global par rfsH rfsLi  
  reset  
  pulse_shaped $par(duration) $rfsH $rfsLi  
  oc_acq_hermit  
}
```

```
proc main {} {  
  global par rfsH rfsLi
```

```
#For Re-optimization in second step
```

```
set rfsH [load_shape F3Li_F_reopt_dur1500us_MAS42_LiQC70k_FC5A50p_XP_rep20.dat]
```

```
set rfsLi [load_shape F3Li_Li_reopt_dur1500us_MAS42_LiQC70k_FC5A50p_XP_rep20.dat]
```

```
set tfopt [oc_optimize $rfsH -max 90000 $rfsLi -max 80000 ]
```

```
save_shape $rfsH ./F3Li_F_reopt_dur1500us_MAS42_LiQC250k_FC5A210p_XP_rep20.dat
```

```
save_shape $rfsLi ./F3Li_Li_reopt_dur1500us_MAS42_LiQC250k_FC5A210p_XP_rep20.dat
```

```
free_all_shapes  
}
```

```
proc target_function {} {  
  global par  
  set par(np) 1.0  
  set f [fsimpson]  
  set Res [findex $f 1 -re]  
  return [format "%.20f" $Res]  
}
```

```
proc gradient {} {  
  global par rshF rshLi  
  
  set par(np) [expr 2*$par(NOC)]  
  set f [fsimpson]  
  return $f  
}
```

## Bruker Pulse Program for OPTIANS 1D experiment

```
;OPTIANS_looping_with presat
;avance-version (20/11/23)
;written by Shovik Ray and Sheetal K. Jain
;
;Avance III version
;parameters:
;p3 : f2 channel 90 at power level PLW3
;p15 : contact time at SPW1(f1) and SPW0(f2)
;p1 : f1 channel power level during contact
;p4 : f1 channel Power level during saturation block
;p12 : decoupling power level (f2)
;spw0 : f2 channel power level during contact
;spw1 : f1 channel power level during contact
;cnst21 : on resonance, usually = 0
;cpdprg2 : spinal64 (at PLW12)
;d1 : recycle delay
;pcpd2 : pulse length in decoupling sequence

;spnam0 : use F-Li_FPulse(1250) from wave folder under lists section of your current topspin version
;spnam1 : use F-Li_LiPulse(1250) from wave folder under lists section of your current topspin version

;zgoptns : -Dfslg, -Dlacq, -Dlcp15, or blank
;cnst31 : spinning speed
;$CLASS=Solids
;$DIM=1D
;$STYPE=optimal control cross polarisation
;$SUBTYPE=simple 1D

; Don't exceed the loop number(l1) beyond 140
prosol relations=<solids_cp>

#include <Avance.incl>

#ifdef fslg
#include <lcalc.incl>
;cnst20 : RF field achieved at p13
;cnst21 : on resonance, usually = 0
;cnst22 : positive LG offset
;cnst23 : negative LG offset
;cnst24 : additional LG-offset
#endif /* fslg */

"acqt0=0" ;defines t=0 for baseopt
"loccp=l1"
"p20=(2.0s/cnst31)"
"occpmix=(2.0s/cnst31)*loccp"

1 ze

2 d1 do:f2
3 d20 ;saturation block starts. If not needed then remove till "lo to 3 times l20".
(p1 p4 ph4):f1
d20*2
(p1 p4 ph4):f1
d20*3
```

```

(p1 pl4 ph4):f1
d20*4
(p1 pl4 ph4):f1
lo to 3 times l20
#ifdef lcp15
#include <p15_prot.incl>

;make sure p15 does not exceed 10 msec

;more is needed

#endif
#ifdef lacq

;disable protection file for long acquisition change decoupling power !!!
;if you set the label lacq (ZGOPTNS -Dlacq), the protection is disabled

#include <aq_prot.incl>

;allows max. 50 msec acquisition time, supervisor
;may change to max. 1s at less than 5 % duty cycle
;and reduced decoupling field

#endif

1u fq=cnst21:f2
1u fq=cnst22:f1
(p3 pl3 ph1):f2
4 (p20:sp1 ph2):f1 (p20:sp0 ph10):f2 ;choose F-Li_FPulse(1250) as spnam0 and F-Li_LiPulse(1250) as ;spnam1 (see
;spnam0 and spnam 1 in comments section)
lo to 4 times l1 ; Don't exceed the loop number(l1) beyond 140
1u cpds2:f2 ;pl12 is used here with spinal64
go=2 ph31
1m do:f2
wr #0
HaltAcqu, 1m
exit

ph0= 0
ph1= 1 3
ph2= 0 0 2 2 1 1 3 3
ph4= 0
ph10= 0
ph31= 0 2 2 0 1 3 3 1

;$ld:$

```

**#** For processing the obtained data, simply use **“ef-apk-absn”**

## Bruker Pulse Program for OPTIANS 2D experiment

;hxhetcor (TOPSPIN 4.3.0)

; heteronuclear correlation between protons and X nuclei  
; with or without homonuclear decoupling during t1  
; possible decoupling schemes are FSLG, PMLG, and DUMBO  
; create dumbo pulse using AU program dumbo  
; create pmlg pulse using AU program pmlg\_shape

; written by Shovik Ray and Sheetal K. Jain

;Avance II+ version

;parameters:

;ns : 2, n\*4  
;d1 : recycle delay  
;p3 : f2 channel 90 at power level PLW3  
;p15 : contact time at SPW1(f1) and SPW0(f2)  
;pl1 : f1 channel power level during contact  
;pl4 : f1 channel Power level during saturation block  
;pl12 : decoupling power level (f2)  
;sp0 : f2 channel power level during contact  
;cnst21 : on resonance, usually = 0  
;cpdprg2 : spinal64 (at PLW12)  
;d1 : recycle delay  
;pcpd2 : pulse length in decoupling sequence  
;spnam0 : use F-Li\_FPulse(1250) from wave folder under lists section of your current topspin version  
;spnam1 : use F-Li\_LiPulse(1250) from wave folder under lists section of your current topspin version  
;pcpd2 : pulse length in decoupling sequence  
;phcor3 : phase correction for optimal FSLG performance: minimize zero frequency glitch in F1  
;cpdprg2 : spinal64  
;cnst20 : LG-RF field as adjusted, in Hz used to calculate cnst22 and cnst23 +and - LG frequency  
;cnst21 : additional LG offset, usually =0  
;cnst22 : +ve LG offset  
;cnst23 : -ve LG offset  
;l0 : =0, increment for t1  
;l3 : 1, 2, or 4 for dwell in t1  
;zgoptns : -Dfslg, -Ddumbo, -Dpmlg, -Dnodedc  
;FnMode : States-TPPI, States, or TPPI for zgoptns -Dnodedc  
; : undefined for all other zgoptns  
;mc2 : States-TPPI, if FnMode undefined, in case of States the statement "1m rp0" must be activated  
; : by removing semicolon at the beginning of the corresponding line  
;in\_010 : =1/swh {f1}, calculated in program  
;nd\_010 : 1

;\$COMMENT=HETCOR (OCCP based), with or w/o homonuclear decoupling during t1, various schemes possible

;\$CLASS=Solids

;\$DIM=2D

;\$TYPE=cross polarisation

;\$SUBTYPE=heteronuclear correlation

define loopcounter nfid

"nfid=td1/2"

;cnst11 : to adjust t=0 for acquisition, if digmod = baseopt

"acqt0=1u\*cnst11"

prosol relations=<solids\_cp>

```

"loccp=l1"
"p20=(2.0s/cnst31)"
"in0 = inf1"
"occpmix=(2.0s/cnst31)*loccp"

1 ze
2 10m do:f2
d1 ;recycle delay
3 d20 ;saturation block starts. If not needed then remove till "lo to 3 times l20".
(p1 pl4 ph4):f1
d20*2
(p1 pl4 ph4):f1
d20*3
(p1 pl4 ph4):f1
d20*4
(p1 pl4 ph4):f1
lo to 3 times l20

(p3 pl12 ph0):f2 ;Fluorine 90 pulse

d0

4 (p20:sp1 ph2):f1 (p20:sp0 ph10):f2 ;choose F-Li_FPulse(1250) as spnam0 and F-Li_LiPulse(1250) as spnam1
lo to 4 times l1 ; (see spnam0 and spnam 1 in comments section)

1u cpds2:f2 ;pl12 is used here with spinal64
go=2 ph31
1m do:f2
10m mc #0 to 2 F1PH(ip0,id0)
exit

ph0= 1 3
ph4= 0
ph2= 0 0 2 2 1 1 3 3
ph10= 0
ph31= 0 2 2 0 1 3 3 1

```

**#\_For processing the obtained data, simply use "xfb"**



**Table S1:** Optimized pulse parameters used in  $^{19}\text{F}$ - $^7\text{Li}$  Experiments involving OPTIANS and RACP.

| Nucleus<br>Parameters           | OPTIANS                                 |                                       | RACP                                    |                                       |
|---------------------------------|-----------------------------------------|---------------------------------------|-----------------------------------------|---------------------------------------|
|                                 | $^{19}\text{F}$                         | $^7\text{Li}$                         | $^{19}\text{F}$                         | $^7\text{Li}$                         |
| Optimal $90^\circ$ pulse length | 112 W, 1.8 $\mu\text{s}$<br>(138.9 kHz) | 80 W, 3.5 $\mu\text{s}$<br>(71.4 kHz) | 112 W, 1.8 $\mu\text{s}$<br>(138.9 kHz) | 80 W, 3.5 $\mu\text{s}$<br>(71.4 kHz) |
| Optimal Contact Pulse Power     | 30 W i.e.,<br>71.8 kHz                  | 70 W i.e.,<br>66.8 kHz                | 65 W i.e.,<br>101.6 kHz<br>(50.8-101.6) | 15 W i.e.,<br>30.9 kHz                |
| Optimal Contact Time            | 1.26 ms                                 |                                       | 300 $\mu\text{s}$                       |                                       |

**Table S2:** Optimized pulse parameters used in  $^{19}\text{F}$ - $^{23}\text{Na}$  Experiments involving OPTIANS and RACP.

| Nucleus<br>Parameters           | OPTIANS                                 |                                         | RACP                                    |                                         |
|---------------------------------|-----------------------------------------|-----------------------------------------|-----------------------------------------|-----------------------------------------|
|                                 | $^{19}\text{F}$                         | $^{23}\text{Na}$                        | $^{19}\text{F}$                         | $^{23}\text{Na}$                        |
| Optimal $90^\circ$ pulse length | 112 W, 1.8 $\mu\text{s}$<br>(138.9 kHz) | 76.5 W, 4.5 $\mu\text{s}$<br>(55.5 kHz) | 112 W, 1.8 $\mu\text{s}$<br>(138.9 kHz) | 76.5 W, 4.5 $\mu\text{s}$<br>(55.5 kHz) |
| Optimal Contact Pulse Power     | 80 W i.e.,<br>117.4 kHz                 | 15 W i.e., 24 kHz                       | 5 W i.e.,<br>101.6 kHz                  | 20 W i.e.,<br>28.41 kHz                 |
| Optimal Contact Time            | 2.66 ms                                 |                                         | 200 $\mu\text{s}$                       |                                         |

**Table S3:** Optimized pulse parameters used in  $^{19}\text{F}$ - $^{27}\text{Al}$  Experiments involving OPTIANS and RACP.

| Nucleus<br>Parameters           | OPTIANS                                |                                          | RACP                                   |                                        |
|---------------------------------|----------------------------------------|------------------------------------------|----------------------------------------|----------------------------------------|
|                                 | $^{19}\text{F}$                        | $^{27}\text{Al}$                         | $^{19}\text{F}$                        | $^{27}\text{Al}$                       |
| Optimal $90^\circ$ pulse length | 15 W, 2.5 $\mu\text{s}$<br>(138.9 kHz) | 20.4 W, 3.18 $\mu\text{s}$<br>(78.6 kHz) | 15 W, 2.5 $\mu\text{s}$<br>(138.9 kHz) | 20 W, 3.18 $\mu\text{s}$<br>(78.6 kHz) |
| Optimal Contact Pulse Power     | 15 W i.e.,<br>153.37 kHz               | 15 W i.e.,<br>67.39 kHz                  | 40 W i.e.,<br>161.2 kHz                | 40 W i.e.,<br>110.13 kHz               |
| Optimal Contact Time            | 266.6 $\mu\text{s}$                    |                                          | 800 $\mu\text{s}$                      |                                        |
